# Supplementary material
Source: HighWire-hosted journal article supplement (https://qdcxjkg.com/highwire/filestream/112858/field_highwire_adjunct_files/7/Figure_8.pdf)

Fig 8

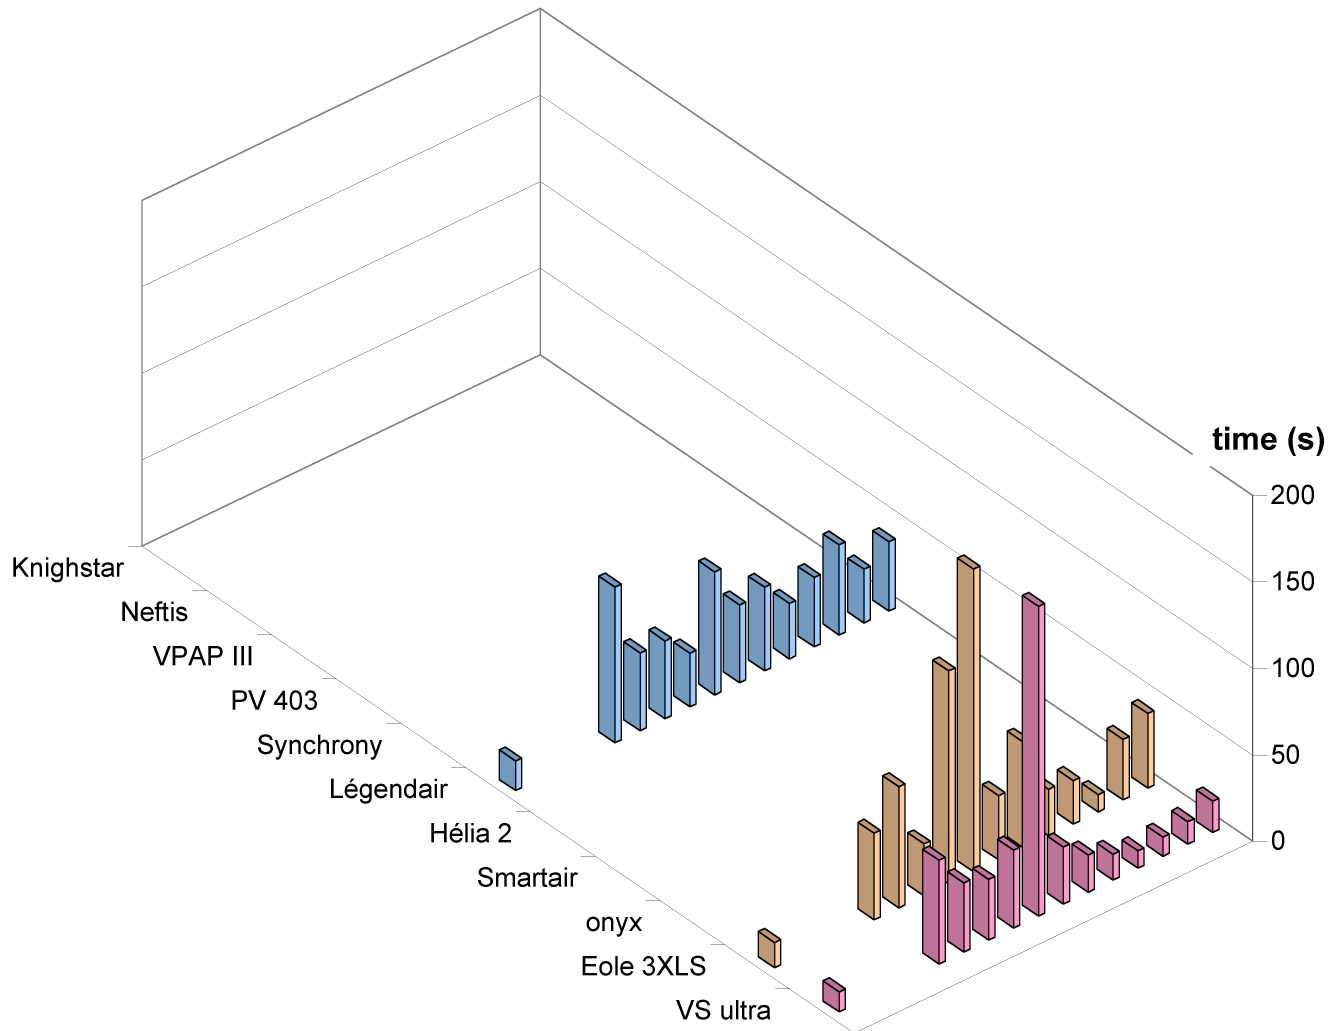

Supplement: Figure_8.pdf [file Figure_8.pdf]
